# Supplementary material for: Transfusion Transmissible Infections in Blood Donors in the Province of Bié, Angola, during a 15-Year Follow-Up, Imply the Need for Pathogen Reduction Technologies
Source: MDPI journal article supplement (doi:10.3390/pathogens10121633), 2021-12-17
Supplement: s1 [file s1]

**Table S1.** Characteristics of the 500 blood donor samples collected in 2007, and those positive for anti-HCV.

| Total Blood Donors, n          | 500                |
|--------------------------------|--------------------|
| Gender                         |                    |
| Male— <i>n</i> (%)             | 412 (82.4)         |
| Female— <i>n</i> (%)           | 88 (17.6)          |
| Age, mean ± SD (range), years  | 429.3 ±9.2 (18–64) |
| Age category                   |                    |
| 18–24                          | 251 (50.2)         |
| 25–49                          | 225(45.0)          |
| >50                            | 13(2.6)            |
| unknown                        | 11(2.2)            |
| Anti-HCV positive <i>n</i> (%) | 20 (4)             |
| Male— <i>n</i> (%)             | 18 (4.4)           |
| Female— <i>n</i> %             | 2 (2.2)            |
| Age 18–24— <i>n</i> (%)        | 8 (3.1)            |
| 25–49— <i>n</i> (%)            | 12 (5.3)           |
| > 50— <i>n</i> (%)             | 0 (0)              |
| HCV RNA testing <i>n</i>       | 20                 |
| Detected                       | 0                  |
| Not detected                   | 20                 |
| Malaria testing, <i>n</i> (%)  | 20                 |
| Positive                       | 14 (70)            |
| Negative                       | 6 (30)             |

The results presented in this table, Supplement 1, are from 500 blood donor in 2007 that consented in providing additional samples that were sent to Brazil for testing. NOTE: the number of blood donors tested for anti-HCV in 2007 displayed in Table 1 and Table 2 (n=848) in the manuscript differ from this table as they refer to data obtained from the *Hospital Geral do Bié's* blood bank records for year 2007. *n*, total number; SD, standard deviation.

**Table S2.** List of rapid tests used during the study period.

| Commercial Rapid Test                              | Manufacturer                                   | Sensitivity (%) | Specificity (%) |
|----------------------------------------------------|------------------------------------------------|-----------------|-----------------|
| <b>HBV</b>                                         |                                                |                 |                 |
| Determine™ HBsAg <sup>1</sup>                      | Abbott Laboratories, Tokyo, Japan              | 98.36           | 100.00          |
| Vikia® HBsAg <sup>1</sup>                          | bioMerieux® Brasil SA, Rio de Janeiro, Brazil  | 98.92           | 99.79           |
| Advanced Quality™ One Step HBsAg test <sup>1</sup> | InTec Products, Inc., Fujian, China            | 98.87           | 98.89           |
| <b>HCV</b>                                         |                                                |                 |                 |
| SD Bioline™ HCV <sup>2</sup>                       | Standard Diagnostics, Kyounggi-do, Korea       | 99.30           | 100.00          |
| Vikia® ANTI HCV <sup>3</sup>                       | bioMerieux® SA, Marcy l'Étoile, France         | 99.62           | 99.90           |
| Anti-HCV Spot <sup>4</sup>                         | Genelabs Diagnostics Pty Ltd, Singapore        | 97.3            | 100.00          |
| HCV rapid test Bioeasy™ <sup>1</sup>               | Bioeasy Diagnostica Ltda.                      | 100.00          | 99.40           |
| Rapid Signal™ HCV <sup>1</sup>                     | Organics Ltda., Yavne, Israel                  | 99.00           | 98.60           |
| <b>HIV</b>                                         |                                                |                 |                 |
| Determine™ HIV 1/2 <sup>1</sup>                    | Abbott Laboratories, Tokyo, Japan              | 99.00           | 100.00          |
| Unigold™ HIV <sup>1</sup>                          | Trinity Biotech, Dublin, Ireland               | 100.00          | 100.00          |
| Vikia® HIV1/2 <sup>1</sup>                         | bioMerieux® Brasil SA, Rio de Janeiro, Brazil  | 99.86           | 99.95           |
| Teste rápido HIV 1/2 Cypress™ <sup>1</sup>         | Cypress Diagnostics, Langdorp, Belgium         | 100.00          | 99.50           |
| <b>Syphilis</b>                                    |                                                |                 |                 |
| RPR-Carbon <sup>5</sup>                            | Biotech                                        | 100.00          | 98.80           |
| VDRL <sup>6</sup>                                  | Atlas Medical                                  | 78.00           | 98.00           |
| Alere Determine™ Syphilis <sup>7</sup>             | Abbott Laboratories, Norwich Connecticut, USA  | 97.20           | 94.10           |
| Teste rapide de la Syphilis Cypress™ <sup>1</sup>  | Cypress Diagnostics, Langdorp, Belgium         | 99.30           | 99.50           |
| Syphilis Strip Test Bioeasy™ <sup>1</sup>          | Bioeasy Diagnostica Ltda., Minas Geras, Brazil | 99.00           | 99.50           |

Sensitivity and specificity obtained through rapid test inserts. <sup>1</sup> manufacturers package insert;

<sup>2</sup> manufacturers website <https://maxanim.com/content/abbott/sd-bioline-hcv.pdf>;

<sup>3</sup> [https://www.biomerieux.co.uk/sites/subsidiary\\_uk/files/vikia\\_anti-hcv\\_brochure.pdf](https://www.biomerieux.co.uk/sites/subsidiary_uk/files/vikia_anti-hcv_brochure.pdf);

<sup>4</sup> World Health Organization Report [http://apps.who.int/iris/bitstream/handle/10665/66829/WHO\\_BCT\\_BTS\\_01.2.pdf?sequence=1](http://apps.who.int/iris/bitstream/handle/10665/66829/WHO_BCT_BTS_01.2.pdf?sequence=1);

<sup>5</sup> [https://www.info.com/serp?q=sifilis+RPR+Carbon&sc=CpYU4oQWsc0410#:~:text=https%3A//pt.scribd.com/document/495792849/RPR-carbon](https://www.info.com/serp?q=sifilis+RPR+Carbon&sc=CpYU4oQWsc0410#:~:text=https%3A//pt.scribd.com/document/495792849/RPR-carbon;);

<sup>6</sup> [https://atlas-medical.com/upload/productFiles/202002/PPI1535A01%20VDRL%20Ag%20kit%20with%20\(+ve,ve\)%20Rev%20A.pdf](https://atlas-medical.com/upload/productFiles/202002/PPI1535A01%20VDRL%20Ag%20kit%20with%20(+ve,ve)%20Rev%20A.pdf); <sup>7</sup> <https://www.info.com/serp?q=TESTE+RAPIDO+DETERMINE+PARA+SIFILIS&sc=T0RKVn9QdY4D10#:~:text=https%3A//doctorlab.com.br/produtos/alere-determine-syphilis-100t-teste-de-sifilis>.
